# Supplementary material
Source: PubMed Central journal article supplement (PMC9171380)
Supplement: mmc1.pdf [file mmc1.pdf]

## **Supplemental Information**

### **Efficient polymer nanoparticle-mediated delivery of gene editing reagents into human hematopoietic stem and progenitor cells**

**Rkia El-Kharrag, Kurt E. Berckmueller, Ravishankar Madhu, Margaret Cui, Gabriela Campoy, Heather M. Mack, Carl B. Wolf, Anai M. Perez, Olivier Humbert, Hans-Peter Kiem, and Stefan Radtke**

**Figure S1**

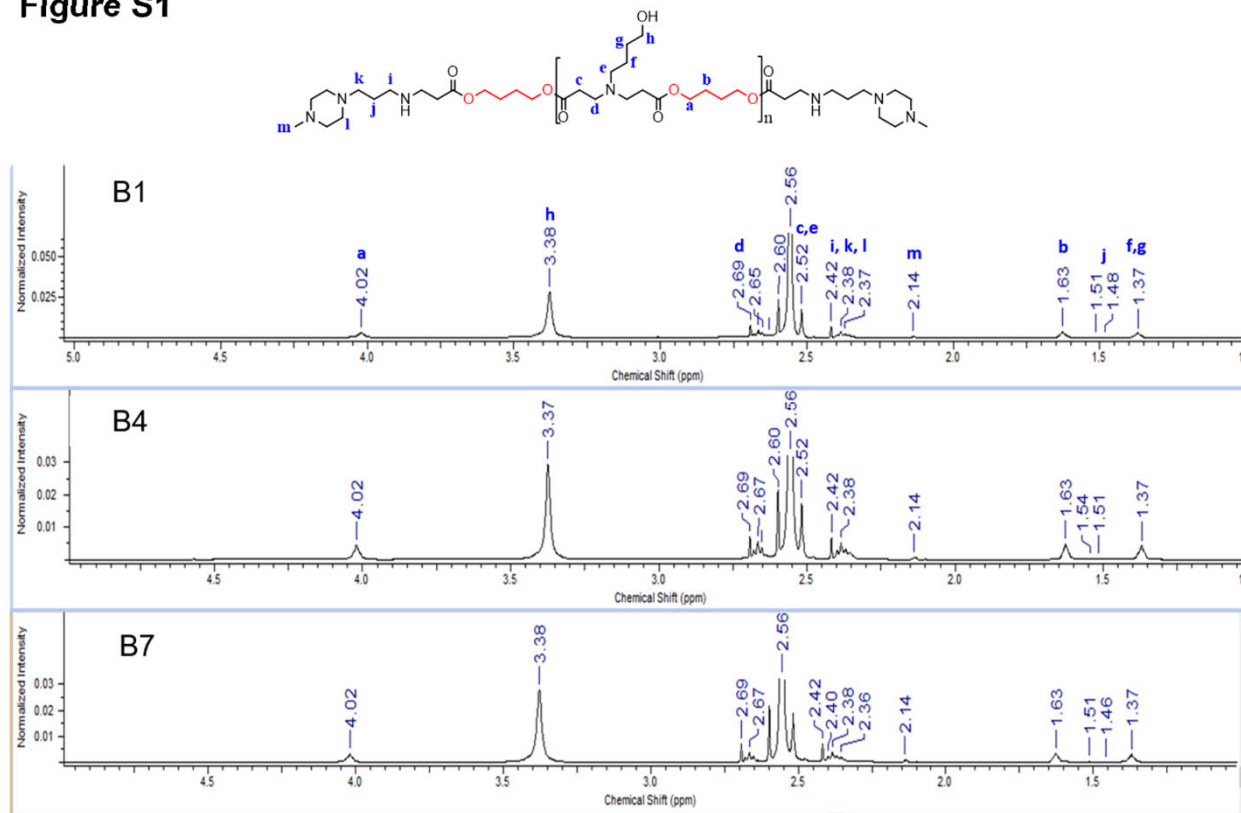

**Figure S1. <sup>1</sup>H-NMR spectra of PBAE polymers**

Representative <sup>1</sup>H-NMR spectra of PBAE polymers prepared with different molar ratios of 1.05:1, 1.1:1, and 1.2:1 (diacrylate to amine). Proton peaks are labeled with letters as indicated in the structure of PBAE at the very top.

Figure S2

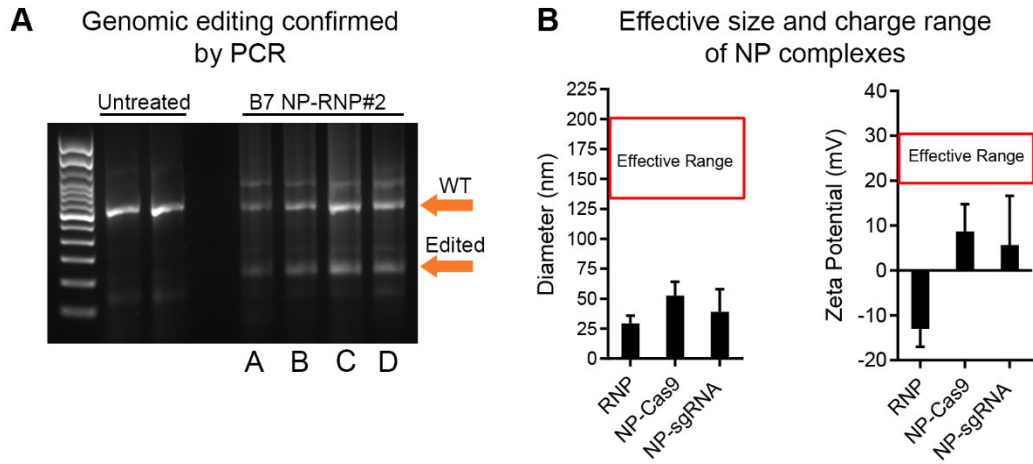

**Figure S2. PCR-based quantification of genomic editing and assessment of the physicochemical properties of individual RNP components**

(A) PCR analysis of untreated and NP-RNP treated human CD34<sup>+</sup> cells from four independent experiments. (B) Size and zeta potential of the RNP without polymer, Cas9 with polymer (NP-Cas9), and sgRNA with polymer (NP-sgRNA). Statistics: (B) mean  $\pm$  SD.

Figure S3

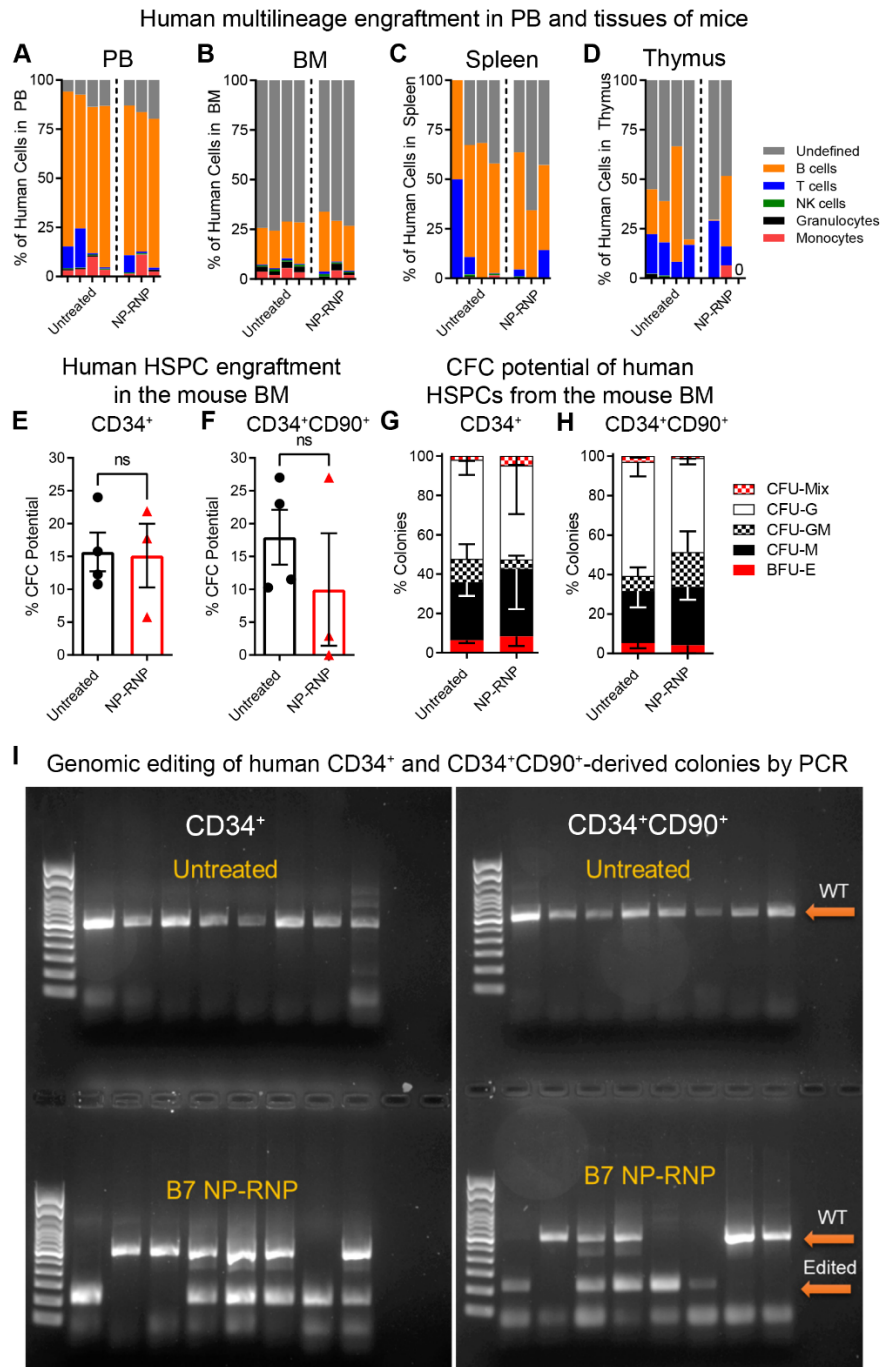

**Figure S3. Multilineage differentiation potential of NP-RNP-edited human CD34<sup>+</sup> cells in NSG mice**

(A-D) Human multilineage engraftment in the (A) PB, (B) BM, (C) spleen, and (D) thymus of mice 20 weeks post-transplant. (E-F) CFC potential of human (E) CD34<sup>+</sup> and (F) CD34<sup>+</sup>CD90<sup>+</sup> cells engrafted in the murine BM. (G-H) Quantification of erythroid, myeloid, and erythro-myeloid colonies derived from (G) CD34<sup>+</sup> and (H) CD34<sup>+</sup>CD90<sup>+</sup> cells. Abbreviations: CFU: colony-forming unit; CFU-M: CFU monocyte/macrophage; CFU-G: CFU granulocyte; CFU-GM: CFU, granulocyte/monocyte/macrophage; BFU-E: burst forming unit erythrocyte; CFU-MIX: CFU containing a mix of erythroid and myeloid cells. (I) PCR analysis to determine the CD33 genotype of individual human CD34<sup>+</sup>- and CD34<sup>+</sup>CD90<sup>+</sup>-derived colonies. Statistics: (E), (F), (G), and (H) mean ± SD.

Figure S4

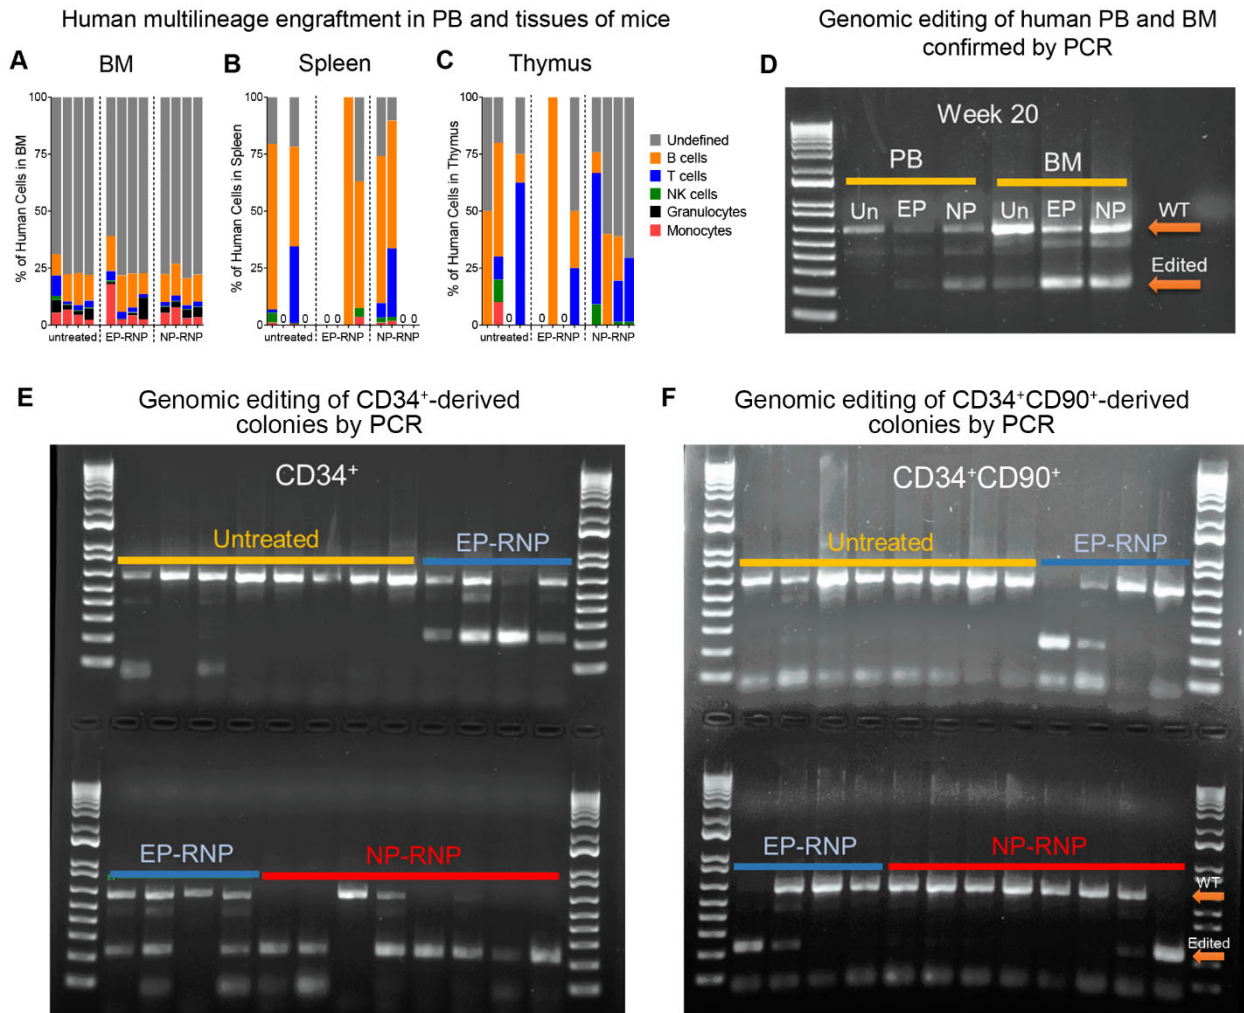

**Figure S4. Multilineage differentiation potential of NP- vs EP-edited human CD34<sup>+</sup> cells in NSG mice** (A-C) Human multilineage engraftment in the (A) BM, (B) spleen, and (C) thymus of mice 20 weeks post-transplant. (D) PCR validation of CD33 editing in human cells in the PB and BM at week 20 post-transplant. (E) PCR analysis to determine the CD33 genotype of individual human CD34<sup>+</sup>- and CD34<sup>+</sup>CD90<sup>+</sup>-derived colonies.

**Table S1.** Monomer molar ratios used to prepare PBAE polymer.

| <b>PBAE Polymer<br/>Batch #</b> | <b>Molar ratio<br/>Diacrylate: amine</b> |
|---------------------------------|------------------------------------------|
| B1                              | 1.05:1                                   |
| B2                              | 1.05:1                                   |
| B3                              | 1.05:1                                   |
| B4                              | 1.1:1                                    |
| B5                              | 1.1:1                                    |
| B6                              | 1.1:1                                    |
| B7                              | 1.2:1                                    |
| B8                              | 1.2:1                                    |
| B9                              | 1.2:1                                    |

**Table S2.** List of sgRNA and primers used.

| Name          | Sequence                        |
|---------------|---------------------------------|
| CD33 5'-sgRNA | 5'-TCCATAGCCAGGGCCCCTGT-3'      |
| CD33 3'-sgRNA | 5'-GCATGTGACAGGTGAGGCAC-3'      |
|               |                                 |
| CD33 Exon 2   | F: 5'-CTGCTCACACAGGAAGCCCTG-3'  |
|               | R: 5'-CTCCCAGTACCAGGGTCCCATC-3' |

Of note, sgRNAs for CD33 used in this study recognize an off-target binding site in SINGLEC22P,<sup>1,2</sup> potentially leading to chromosomal rearrangements that were not further investigated and are not expected to impact the outcome of this proof-of-concept work. Alternative sgRNAs without off-target recognition can be found in Borot et al.<sup>3</sup>

**Table S3.** Antibodies.

| Antigen   | Provider        | Catalog Number | Clone Name | Lot Number                               | Fluorochrome         | Application                               |
|-----------|-----------------|----------------|------------|------------------------------------------|----------------------|-------------------------------------------|
| CD3       | BioLegend       | 300468         | UCHT1      | B312505                                  | Brilliant Violet 650 | Mouse BM, PB, Spleen, Thymus              |
| CD4       | Caprico         | 1120196        | SK3        | 120A6F1                                  | iFluor700            | Mouse BM, PB, Spleen, Thymus              |
| CD8       | Caprico         | 1109156        | SK1        | 109SBF1                                  | mFluor500            | Mouse BM, PB, Spleen, Thymus              |
| CD14      | Caprico         | 103486         | 26ic       | 34A2T2                                   | PE-Cyanine7          | Mouse BM, PB, Spleen, Thymus              |
| CD15      | Caprico         | 105026         | FUT4/815   | 50AE3                                    | PE                   | Mouse BM, PB, Spleen, Thymus              |
| CD16      | Caprico         | 101496         | 3GB        | 14A4T2                                   | APC-Cyanine7         | Mouse BM, PB, Spleen, Thymus              |
| CD19      | Caprico         | 102966         | 4G7        | 29AT1                                    | PerCP-Cyanine5.5     | Mouse BM, PB, Spleen, Thymus              |
| CD20      | Caprico         | 103766         | 2H7        | 37AT1                                    | PerCP-Cyanine5.5     | Mouse BM, PB, Spleen, Thymus              |
| CD33      | Miltenyi Biotec | 130-113-345    | AC104.3E3  | 5201201244<br>5210310027<br>5200506236   | APC                  | Mouse BM, PB, Spleen, Thymus              |
| CD34      | BD              | 550761         | 563        | 0009121<br>0073826<br>8220707<br>9102676 | PE                   | Human HSPCs, Mouse BM                     |
| CD38      | BioLegend       | 303522         | HIT2       | B301400                                  | PerCP/Cyanine5.5     | Human HSPCs, Mouse BM                     |
| CD45 (hu) | BD Biosciences  | 560367         | HI30       | 9289771                                  | V450                 | Human HSPCs, Mouse BM, PB, Spleen, Thymus |
| CD45 (hu) | Caprico         | 1016146        | F10-89-4   | 16A4F2<br><br>16A4F3                     | mFluor450            | Human HSPCs, Mouse BM, PB, Spleen, Thymus |
| CD45(mu)  | BD Biosciences  | 562383         | 30-F11     | 9351589<br>0013784<br>1018574            | PE-CF594             | Mouse BM, PB, Spleen, Thymus              |
| CD45RA    | BD Biosciences  | 561212         | 5H9        | 66660                                    | APC-H7               | Human HSPCs, Mouse BM                     |
| CD56      | Caprico         | 101696         | MY31       | 106A4T3                                  | APC-Cyanine7         | Mouse BM, PB, Spleen, Thymus              |
| CD90      | BioLegend       | 328124         | 5E10       | B277256                                  | PE/Cy7               | Human HSPCs, Mouse BM                     |
| CD90      | BD Biosciences  | 561971         | 5E10       | 5247689                                  | APC                  | Human HSPCs, Mouse BM                     |



## SUPPLEMENTAL REFERENCES

1. Shaw, B.C., and Estus, S. (2021). Pseudogene-mediated gene conversion after CRISPR-Cas9 editing demonstrated by partial CD33 conversion with SIGLEC22P. *CRISPR J* **4**: 699-709.
2. Kim, M.Y., Yu, K.R., Kenderian, S.S., Ruella, M., Chen, S., Shin, T.H., Aljanahi, A.A., Schreeder, D., Klichinsky, M., Shestova, O., *et al.* (2018). Genetic inactivation of CD33 in hematopoietic stem cells to enable CAR T cell immunotherapy for acute myeloid leukemia. *Cell* **173**: 1439-1453 e1419.
3. Borot, F., Wang, H., Ma, Y., Jafarov, T., Raza, A., Ali, A.M., and Mukherjee, S. (2019). Gene-edited stem cells enable CD33-directed immune therapy for myeloid malignancies. *Proc Natl Acad Sci U S A* **116**: 11978-11987.
